## CORRECTION

## Correction: A Golgi-associated protein 4.1B variant is required for assimilation of proteins in the membrane (doi:10.1242/jcs.039644)

Qiaozhen Kang, Ting Wang, Huizheng Zhang, Narla Mohandas and Xiuli An

This Correction updates the Expression of Concern (doi:10.1242/jcs.233080) relating to *J. Cell Sci.* (2009) **122**, 1091-1099 (doi:10.1242/jcs.039644).

The wrong western blot was used for the anti-4.1G U1 panel in Fig. 1B. The original full blots for this figure are no longer available so the corresponding author, Xiuli An, repeated the experiment with the original antibody. The new results confirm the specificity of the anti-4.1G U1 antibody, as shown here.

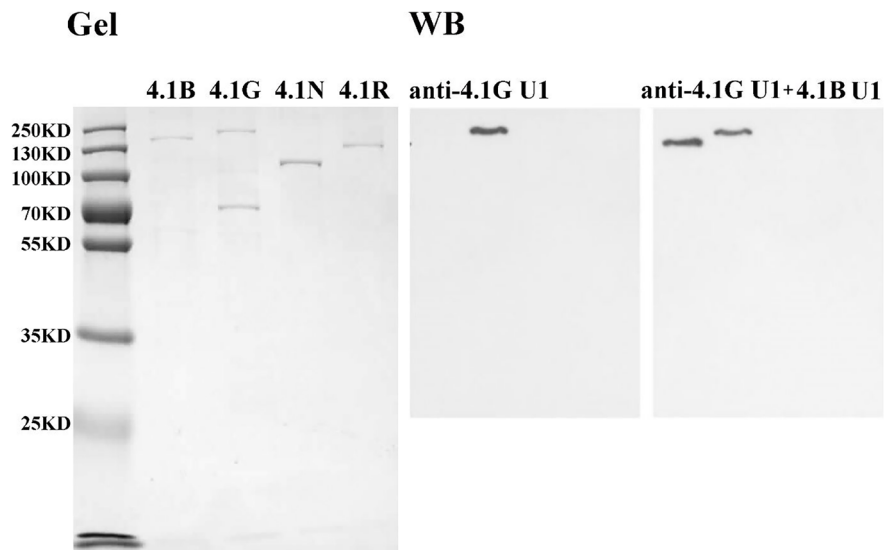

**Repeat of Fig. 1B.** SDS-PAGE of purified recombinant protein 4.1 family members: 4.1B, 4.1G, 4.1N and 4.1R (left). Western blotting using anti-4.1G U1 antibody (middle) followed by re-probe with anti-4.1B U1 antibody (right).

During our investigation into this matter, a reader also noticed that the cell images acquired using the anti-4.1B U2 antibody in Fig. 3 were duplicated for HBE and MDCK cells. This was an error that occurred during figure preparation. The authors provided the original images and the corrected figure is shown here. The authors apologise to readers for any inconvenience caused by these errors, which do not affect the conclusions of the paper.

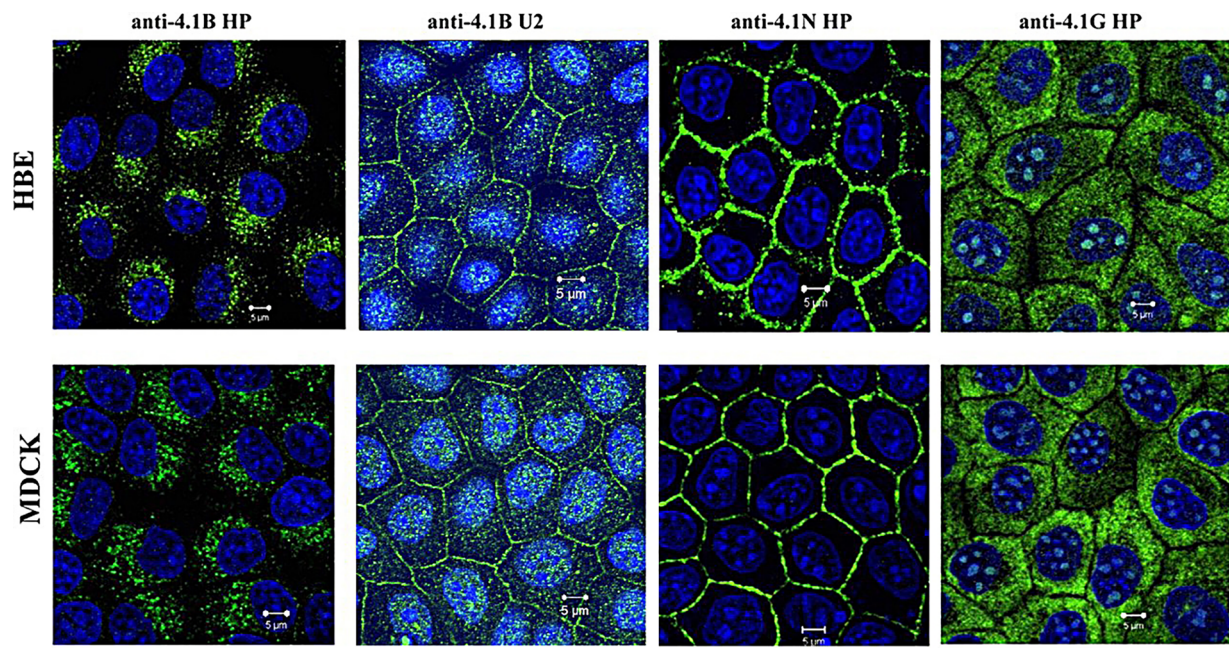

**Fig. 3.** Localization of 4.1 proteins in MDCK and HBE cells. MDCK and HBE cells were stained with rabbit polyclonal anti-4.1B-HP, anti-4.1B-U2, anti-4.1N-HP and anti-4.1G-HP, followed by anti-rabbit Alexa Fluor 488-conjugated secondary antibody. Nuclei were stained with Trops 3 (blue). The images were analyzed by confocal microscopy. Note the distinct localization of different epitopes. Scale bars: 5 μm.
